# Supplementary material for: Alpha-Linolenic Acid-Enriched Butter Promotes Fatty Acid Remodeling and Thermogenic Activation in the Brown Adipose Tissue
Source: PubMed Central journal article supplement (PMC7019653; doi:10.3390/nu12010136), 2020-01-03
Supplement: nutrients-12-00136-s001.pdf [file nutrients-12-00136-s001.pdf]

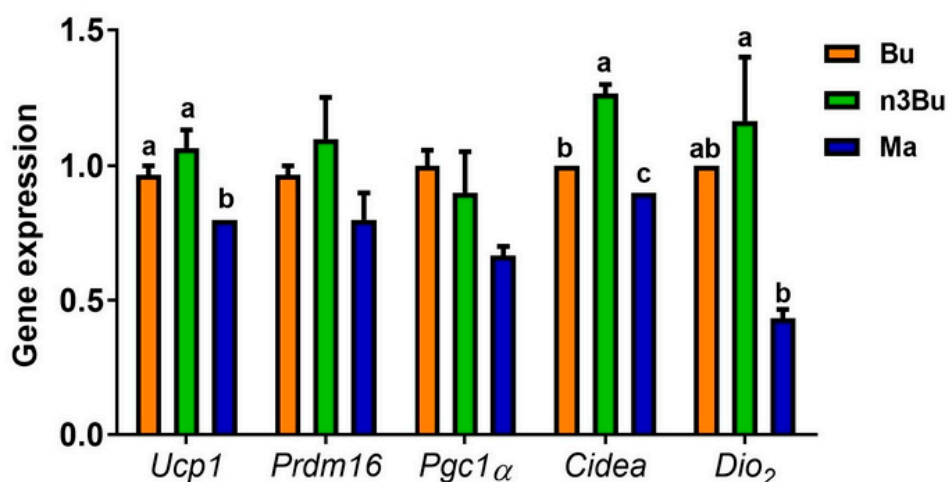

**Figure S1.** Supplementation with ALA-biofortified butter alters thermogenic genes expression in the BAT. mRNA expression levels of *Ucp1*, *Prdm16*, *Pgc1 $\alpha$* , *Cidea*, and *Dio2* from the pooled DNA (n=8 per group) with triplicated assay. All data represented as mean  $\pm$  SEM. Treatments with different letters are significantly different from one another by one-way ANOVA (P<0.05).

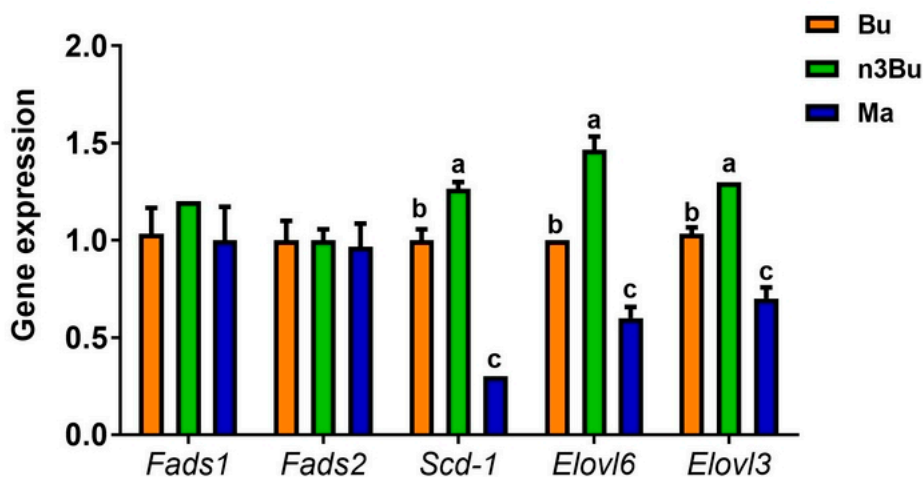

**Figure S2.** Supplementation with ALA-biofortified butter increased fatty acid denaturation and elongation related genes expression in the BAT. mRNA expression levels of *Fads1*, *Fads2*, *Scd-1*, *Elovl6*, and *Elovl3* from the pooled DNA (n=8 per group) with triplicated assay. All data represented as mean  $\pm$  SEM. Treatments with different letters are significantly different from one another by one-way ANOVA (P<0.05).

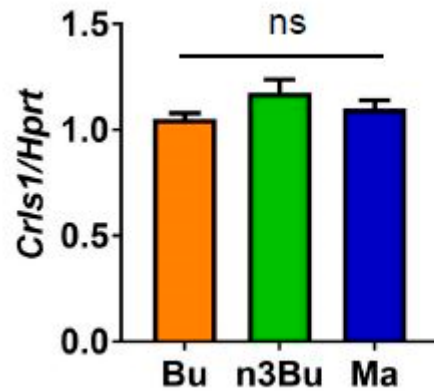

**Figure S3.** Supplementation with ALA-biofortified butter did not alter cardiolipin (CL) synthase (*Crls1*) expression in the BAT. mRNA expression *Crls1* in the BAT (n=4 of individual animals per group). All data represented as mean ± SEM. Treatments with different letters are significantly different from one another by one-way ANOVA (P<0.05).

**Table S1.** Diet composition of HF diet

| Ingredients (g)         | Diet |      |      |
|-------------------------|------|------|------|
|                         | Bu   | n3Bu | Ma   |
| Casein                  | 235  | 235  | 235  |
| L-cystine               | 5    | 5    | 5    |
| Corn starch             | 210  | 210  | 210  |
| Maltodextrin            | 100  | 100  | 100  |
| Sucrose                 | 100  | 100  | 100  |
| Cholesterol             | 2    | 2    | 2    |
| Cellulose               | 50   | 50   | 50   |
| Mineral mix             | 35   | 35   | 35   |
| Calcium carbonate       | 30   | 30   | 30   |
| Vitamin mix             | 10   | 10   | 10   |
| Choline bitartrate      | 2.5  | 2.5  | 2.5  |
| <b>Solid Fat</b>        |      |      |      |
| Hiland Butter           | 240  | -    | -    |
| Sunseo Omega Butter     | -    | 240  | -    |
| Land O Lake Margarine   | -    | -    | 240  |
| % calories from Fat     | 45.4 | 45.4 | 45.4 |
| % calories from CHO     | 34.4 | 34.4 | 34.4 |
| % calories from Protein | 20.2 | 20.2 | 20.2 |
| Kcal/g diet             | 4.67 | 4.67 | 4.67 |

**Table S2.** Primer sequences for qPCR.

| Primer        | Primer sequence                                                       |
|---------------|-----------------------------------------------------------------------|
| <i>Ucp1</i>   | F: 5'-AGGCTTCCAGTACCATTAGGT-3'<br>R: 5'-CTGAGTGAGGCAAAGCTGATTT-3'     |
| <i>Prdm16</i> | F: 5'-CAG CAC GGT GAA GCC ATT C-3'<br>R: 5'-GCG TGC ATC CGC TTG TG-3' |
| <i>Pgc1α</i>  | F: 5'-CCCTGCCATTGTTAAGACC-3'<br>R: 5'-TGCTGCTGTTCCCTGTTTTTC-3'        |
| <i>Cidea</i>  | F: 5'-TGCTCTTCTGTATCGCCAGT-3'<br>R: 5'-GCCGTGTTAAGGAATCTGCTG-3'       |
| <i>Dio2</i>   | F: 5'-CAGTGTGGTGCACGTCTCCAATC-3'<br>R: 5'-TGAACCAAAGTTGACCACCAG-3'    |
| <i>Fads1</i>  | F: 5'-TCAGTCTTTGGCACCTCGAC-3'<br>R: 5'-TCCTTGCGGAAGCAGTTAGG-3'        |
| <i>Fads2</i>  | F: 5'-TCCTGTCCCACATCATCGTCATGG-3'<br>R: 5'-GCTTGGGCTGAGAGGTAGCGA-3'   |
| <i>Scd-1</i>  | F: 5'-GGGACAGATATGGTGTGAAACTATG-3'<br>R: 5'-TTACAGACACTGCCCTCAAC-3'   |
| <i>Elovl6</i> | F: 5'-CGTAGCGACTCCGAAGATCAGCC-3'<br>R: 5'-AGCGTACAGCGCAGAAAACAGGA-3'  |
| <i>Elovl3</i> | F: 5'-CTTCGAGACGTTTCAGGACTTAAG-3'<br>R: 5'-TCTGGCCAACAACGATGAG-3'     |
| 16S rRNA      | F: 5'-CCGCAAGGGAAAGATGAAAGAC-3'<br>R: 5'-TCGTTTGGTTTCGGGGTTTC-3'      |
| Hexokinase    | F: 5'-GCCAGCCTCTCTGATTTTAGTGT-3'<br>R: 5'-GGGAACACAAAAGACCTCTCTGG-3'  |

**Table S3.** List of primary antibodies

| Antibody | Host   | Dilution | Company        | Catalog no. |
|----------|--------|----------|----------------|-------------|
| UCP1     | Rabbit | 1:1000   | Abcam          | Ab155117    |
| PRDM16   | Mouse  | 1:1000   | Santa Cruz     | Sc130243    |
| CD11c    | Rabbit | 1:1000   | Cell Signaling | 97585       |
| F4/80    | Rabbit | 1:1000   | Abcam          | Ab6640      |
| SCD1     | Rabbit | 1:1000   | Cell Signaling | 2794        |
| Elovl6   | Rabbit | 1:1000   | Abcam          | Ab69857     |
| VDAC1    | Rabbit | 1:1000   | Cell Signaling | 4661        |
| PDH      | Rabbit | 1:1000   | Cell Signaling | 3205        |
| OxPhos   | Mouse  | 1:250    | Abcam          | ab110413    |
| SIRT3    | Rabbit | 1:1000   | Cell Signaling | 5490        |
| β-actin  | Rabbit | 1:1000   | Cell Signaling | 4967        |
